# Supplementary material for: Combining Aspirin with Cholecalciferol (Vitamin D3) – A Potential New Tool for Controlling Possum Populations
Source: PLoS One. 2013 Aug 9;8(8):e70683. doi: 10.1371/journal.pone.0070683 (PMC3739777; doi:10.1371/journal.pone.0070683)
Supplement: Table S3 — Data for Table 3 . (XLSX) [file pone.0070683.s003.xlsx]

## Sheet: Sheet1
Group	Date of treatment	Method	Chole % purity	Lab report	No.	Sex	pre dosing wt	Dose chole (mg/kg)	Dose aspirin (g)	Dose aspirin (g/kg)	Fate	Time until death (hours)	Body weight at death or end point (kg)	% body weight change
1	2007-05-28	Intubated	NA	-	5	M	4.26	0	0	0	Survived	-	4.19	-1.64319
1	2007-05-28	Intubated	NA	-	8	F	2.13	0	0	0	Survived	-	1.98	-7.04225
1	2007-05-28	Intubated	NA	-	13	F	3.3	0	0	0	Survived	-	3.21	-2.72727
1	2007-05-28	Intubated	NA	-	20	M	3.44	0	0	0	Survived	-	3.34	-2.90698
1	2007-05-28	Intubated	NA	-	31	M	2.45	0	0	0	Survived	-	1.8	-26.5306
1	2007-05-28	Intubated	NA	-	30	F	1.93	0	0	0	Survived	-	2.18	12.9534
2	2007-05-28	Intubated	87.8	T2709	4	M	3.03	1	1	0.330033	Died	12	2.61	-13.8614
2	2007-05-28	Intubated	87.8	T2709	11	F	2.09	1	1	0.478469	Died	12	1.92	-8.13397
2	2007-05-28	Intubated	87.8	T2709	21	M	3.18	1	1	0.314465	Died	12	2.75	-13.522
2	2007-05-28	Intubated	87.8	T2709	26	M	3.31	1	1	0.302115	Died	12	2.81	-15.1057
2	2007-05-28	Intubated	87.8	T2709	1	F	2.81	1	1	0.355872	Survived	-	2.63	-6.40569
2	2007-05-28	Intubated	87.8	T2709	17	F	3.73	1	1	0.268097	Survived	-	3.05	-18.2306
3	2007-05-28	Intubated	87.8	T2709	7	F	3.63	2	1	0.275482	Died	45	3.09	-14.876
3	2007-05-28	Intubated	87.8	T2709	12	F	2.62	2	1	0.381679	Died	2	2.82	7.63359
3	2007-05-28	Intubated	87.8	T2709	22	M	3.57	2	1	0.280112	Died	45	3.24	-9.2437
3	2007-05-28	Intubated	87.8	T2709	27	M	3.04	2	1	0.328947	Died	2	3.04	0
3	2007-05-28	Intubated	87.8	T2709	3	M	2.69	2	1	0.371747	Survived	-	2.42	-10.0372
3	2007-05-28	Intubated	87.8	T2709	33	F	3.36	2	1	0.297619	Survived	-	3.02	-10.119
4	2007-05-28	Intubated	87.8	T2709	16	F	3.1	4	1	0.322581	Died	12	2.94	-5.16129
4	2007-05-28	Intubated	87.8	T2709	19	F	3.51	4	1	0.2849	Died	27	3.27	-6.83761
4	2007-05-28	Intubated	87.8	T2709	25	M	3.21	4	1	0.311526	Died	27	2.83	-11.838
4	2007-05-28	Intubated	87.8	T2709	28	M	3.17	4	1	0.315457	Died	12	2.77	-12.6183
4	2007-05-28	Intubated	87.8	T2709	10	F	2.03	4	1	0.492611	Survived	-	1.77	-12.8079
4	2007-05-28	Intubated	87.8	T2709	23	M	3.52	4	1	0.284091	Survived	-	3.11	-11.6477
5	2007-05-28	Intubated	87.8	T2709	6	M	3.74	8	1	0.26738	Died	12	3.51	-6.14973
5	2007-05-28	Intubated	87.8	T2709	9	F	3.64	8	1	0.274725	Died	12	3.3	-9.34066
5	2007-05-28	Intubated	87.8	T2709	15	F	2.26	8	1	0.442478	Died	12	2.02	-10.6195
5	2007-05-28	Intubated	87.8	T2709	24	M	2.51	8	1	0.398406	Died	12	2.43	-3.18725
5	2007-05-28	Intubated	87.8	T2709	29	M	3.23	8	1	0.309598	Died	12	2.95	-8.66873
5	2007-05-28	Intubated	87.8	T2709	32	F	3.26	8	1	0.306748	Died	12	3.04	-6.74847
