# Supplementary material for: Combining Aspirin with Cholecalciferol (Vitamin D3) – A Potential New Tool for Controlling Possum Populations
Source: PLoS One. 2013 Aug 9;8(8):e70683. doi: 10.1371/journal.pone.0070683 (PMC3739777; doi:10.1371/journal.pone.0070683)
Supplement: Table S6 — Data for Figure 1 . (XLSX) [file pone.0070683.s006.xlsx]

## Sheet: Sheet1
Possum no	Treatment	Sex	Weight	Time	Calcium (nmol/l)
7	Asp	M	2.73	-8	2.77
21	Asp	M	3.73	-8	2.92
23	Asp	M	3.1	-8	2.31
29	Asp	F	2.51	-8	2.33
30	Asp	F	2.77	-8	2.43
46	Asp	M	3	-8	2.59
7	Asp	M	2.73	0.17	2.78
21	Asp	M	3.73	0.17	2.68
23	Asp	M	3.1	0.17	2.52
29	Asp	F	2.51	0.33	2.62
30	Asp	F	2.77	0.33	2.54
46	Asp	M	3	0.33	2.61
7	Asp	M	2.73	0.67	2.46
21	Asp	M	3.73	0.67	2.5
23	Asp	M	3.1	0.67	2.29
29	Asp	F	2.51	1	2.49
30	Asp	F	2.77	1	2.29
46	Asp	M	3	1	2.57
7	Asp	M	2.73	2	2.51
21	Asp	M	3.73	2	2.26
23	Asp	M	3.1	2	2.4
29	Asp	F	2.51	3	2.53
30	Asp	F	2.77	3	2.34
46	Asp	M	3	3	2.54
7	Asp	M	2.73	4	2.7
21	Asp	M	3.73	4	2.51
23	Asp	M	3.1	4	2.62
29	Asp	F	2.51	6	2.64
30	Asp	F	2.77	6	2.55
46	Asp	M	3	6	2.74
7	Asp	M	2.73	8	2.76
21	Asp	M	3.73	8	2.66
23	Asp	M	3.1	8	2.72
29	Asp	F	2.51	10	2.67
30	Asp	F	2.77	10	2.57
46	Asp	M	3	10	2.73
2	Asp+D3	M	3.21	-8	2.82
4	Asp+D3	F	3.58	-8	2.84
14	Asp+D3	F	2.77	-8	2.16
24	Asp+D3	M	2.97	-8	2.59
38	Asp+D3	M	2.47	-8	2.59
45	Asp+D3	M	3.58	-8	2.7
2	Asp+D3	M	3.21	0.17	2.51
4	Asp+D3	F	3.58	0.17	2.83
14	Asp+D3	F	2.77	0.17	2.43
24	Asp+D3	M	2.97	0.33	2.78
38	Asp+D3	M	2.47	0.33	2.73
45	Asp+D3	M	3.58	0.33	2.21
2	Asp+D3	M	3.21	0.67	2.76
4	Asp+D3	F	3.58	0.67	2.62
14	Asp+D3	F	2.77	0.67	2.52
24	Asp+D3	M	2.97	1	2.76
45	Asp+D3	M	3.58	1	2.52
2	Asp+D3	M	3.21	2	2.49
4	Asp+D3	F	3.58	2	2.74
14	Asp+D3	F	2.77	2	2.81
24	Asp+D3	M	2.97	3	3.32
45	Asp+D3	M	3.58	3	2.95
2	Asp+D3	M	3.21	4	3.59
4	Asp+D3	F	3.58	4	3.66
14	Asp+D3	F	2.77	4	3.6
45	Asp+D3	M	3.58	6	3.1
3	Asp+D3	F	3.58	8	2.5
45	Asp+D3	M	3.58	10	2.97
1	D3	F	3.14	-8	2.86
10	D3	M	4.64	-8	3.03
13	D3	M	3.3	-8	2.08
20	D3	F	2.64	-8	2.63
31	D3	M	4.04	-8	2.78
33	D3	F	2.81	-8	2.59
1	D3	F	3.14	0.17	2.75
10	D3	M	4.64	0.17	2.94
13	D3	M	3.3	0.17	2.69
20	D3	F	2.64	0.33	2.75
31	D3	M	4.04	0.33	2.92
33	D3	F	2.81	0.33	2.91
1	D3	F	3.14	0.67	2.62
10	D3	M	4.64	0.67	2.79
13	D3	M	3.3	0.67	2.76
20	D3	F	2.64	1	2.41
31	D3	M	4.04	1	2.94
33	D3	F	2.81	1	2.81
1	D3	F	3.14	2	2.88
10	D3	M	4.64	2	2.78
13	D3	M	3.3	2	2.69
20	D3	F	2.64	3	3.42
33	D3	F	2.81	3	3.34
1	D3	F	3.14	4	3.29
10	D3	M	4.64	4	3.59
13	D3	M	3.3	4	3.24
9	Nil	M	4.63	-8	3.04
18	Nil	M	3.15	-8	2.37
19	Nil	M	2.71	-8	2.87
26	Nil	F	2.46	-8	2.5
32	Nil	F	3.36	-8	2.65
42	Nil	F	2.84	-8	2.53
9	Nil	M	4.63	0.17	2.85
18	Nil	M	3.15	0.17	2.64
19	Nil	M	2.71	0.17	2.94
26	Nil	F	2.46	0.33	2.92
32	Nil	F	3.36	0.33	2.91
42	Nil	F	2.84	0.33	2.73
9	Nil	M	4.63	0.67	2.57
18	Nil	M	3.15	0.67	2.48
19	Nil	M	2.71	0.67	2.83
26	Nil	F	2.46	1	2.67
32	Nil	F	3.36	1	2.63
42	Nil	F	2.84	1	2.69
9	Nil	M	4.63	2	2.55
18	Nil	M	3.15	2	2.46
19	Nil	M	2.71	2	2.65
26	Nil	F	2.46	3	2.49
32	Nil	F	3.36	3	2.4
42	Nil	F	2.84	3	2.61
9	Nil	M	4.63	4	2.71
18	Nil	M	3.15	4	2.45
19	Nil	M	2.71	4	2.61
26	Nil	F	2.46	6	2.77
32	Nil	F	3.36	6	2.71
42	Nil	F	2.84	6	2.83
9	Nil	M	4.63	8	2.89
18	Nil	M	3.15	8	2.63
19	Nil	M	2.71	8	2.79
26	Nil	F	2.46	10	2.65
32	Nil	F	3.36	10	2.48
42	Nil	F	2.84	10	2.68
